# Supplementary material for: Neutralization of ionic interactions by dextran-based single-chain nanoparticles improves tobramycin diffusion into a mature biofilm
Source: NPJ Biofilms Microbiomes. 2022 Jul 4;8:52. doi: 10.1038/s41522-022-00317-9 (PMC9253323; doi:10.1038/s41522-022-00317-9)
Supplement: Supplementary file 1 — Supplemental Material [file 41522_2022_317_MOESM1_ESM.pdf]

## SUPPLEMENTARY INFORMATION

# Neutralization of ionic interactions by dextran-based single-chain nanoparticles improves tobramycin diffusion into a mature biofilm

Núria Blanco-Cabra<sup>1,2,\*</sup>, Julie Movellan<sup>3</sup>, Marco Marradi<sup>3,4</sup>, Raquel Gracia<sup>3</sup>, Cristian Salvador<sup>3</sup>, Damien Dupin<sup>3</sup>, Iraida Loinaz<sup>3</sup>, Eduard Torrents<sup>1,2,\*</sup>

## Physico-chemical properties of pharmagrade dextran 40 kDa used as precursor for the synthesis of DXT-SCPNs

Dh (DLS, 10 mg/mL in PBS) =  $11 \pm 1$  nm, PdI =  $0.19 \pm 0.05$

Data from batch release certificate: Mw = 42208 Da, Mw/Mn = 1.3

**Supplementary Figure 1.** Functionalization of DXT-SCPN with Rhodamine and 3-mercaptopropionic acid (MPA). DXT is a branched polymer but is drawn as linear for reasons of clarity.

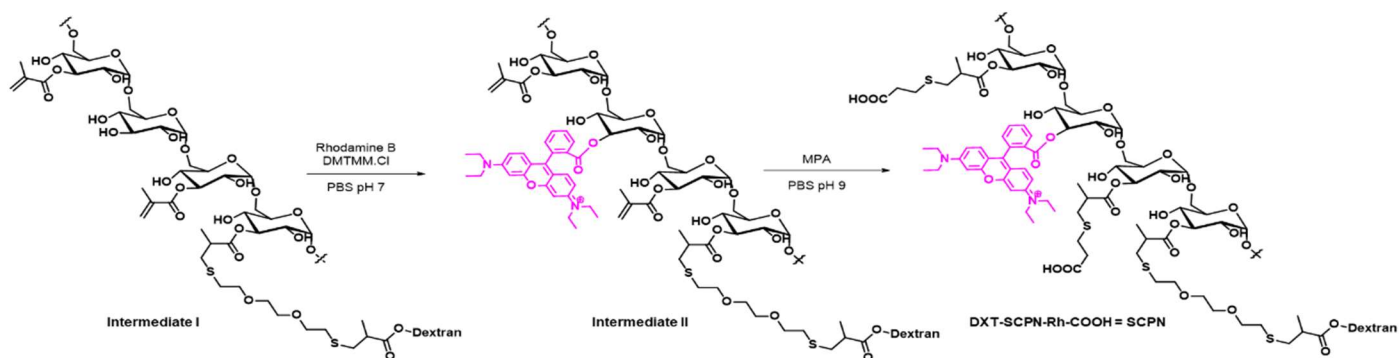

**Supplementary Figure 2.**  $^1\text{H}$  NMR spectrum of rhodamine-labelled SCPN in  $\text{D}_2\text{O}$

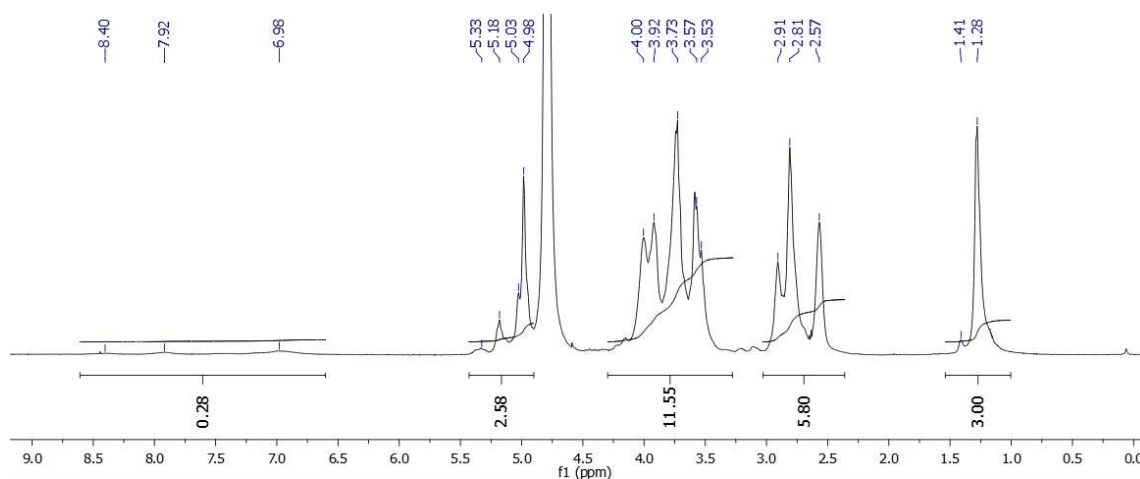

**Supplementary Figure 3.** UV-vis calibration curve for Rhodamine B in PBS.

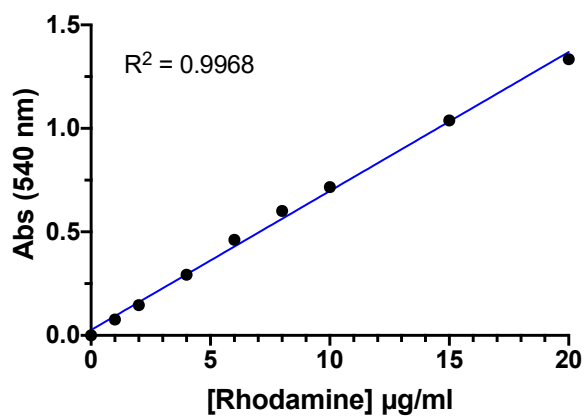

**Supplementary Figure 4.**  $^1\text{H}$  NMR spectra of SCPN, DNase I-SCPN, Tob-SCPN, Tob-DNase I-SCPN, DNase I, and Tobramycin in  $\text{D}_2\text{O}$ .

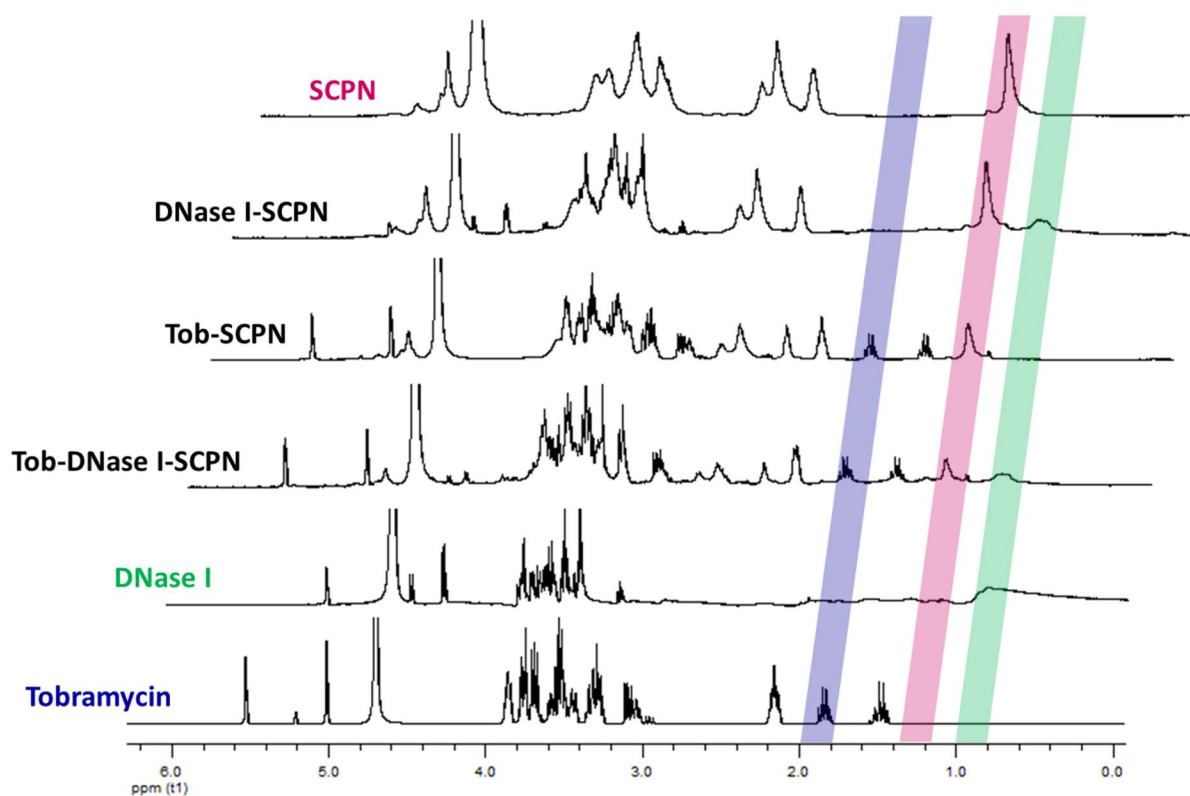

**Supplementary Table 1.** Percentage of dead bacteria biomass (stained in red in the Live/Dead BacLight Bacterial Viability Kit) in the total biofilm biomass of the 72-hour-old biofilms of *P. aeruginosa* treated for 16 hours with 0.26 µg/ml DNase I and/or 2 µg/ml tobramycin and with nanoformulation containing SCPN with the corresponding concentration of both actives. Refer to figure 2 for microscopic images.

|                                               | <b>CONTROL</b>   | <b>SCPN</b>      | <b>Tob +<br/>DNase I</b> | <b>Tob +<br/>DNase I<br/>SCPN</b> | <b>Tob</b>       | <b>Tob<br/>SCPN</b> | <b>DNase I</b>   | <b>DNase I<br/>SCPN</b> |
|-----------------------------------------------|------------------|------------------|--------------------------|-----------------------------------|------------------|---------------------|------------------|-------------------------|
| <b>% Dead<br/>biomass /<br/>Total biomass</b> | 5,57 %<br>± 0,86 | 5,67 %<br>± 0,32 | 9,75 %<br>± 0,64         | 12,44 %<br>± 0,13                 | 9,56 %<br>± 0,47 | 12,29 %<br>± 0,61   | 7,14 %<br>± 0,52 | 8,54 %<br>± 0,26        |
